# Supplementary material
Source: publisher figshare collection journal article supplement (https://future-science-group.figshare.com/ndownloader/files/32837333)
Supplement: Supplementary file 1 [file 32837333]

**Supplementary materials**

**Determination of favipiravir in human plasma using homogeneous liquid-liquid microextraction followed by HPLC/UV**


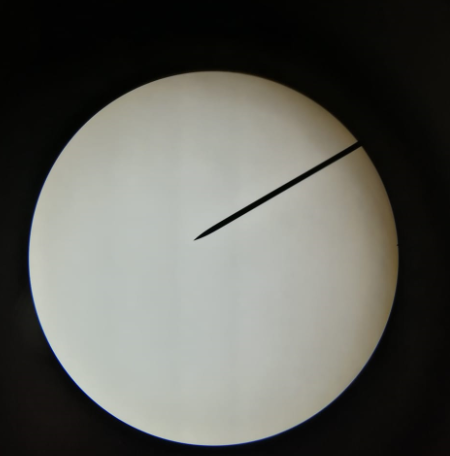

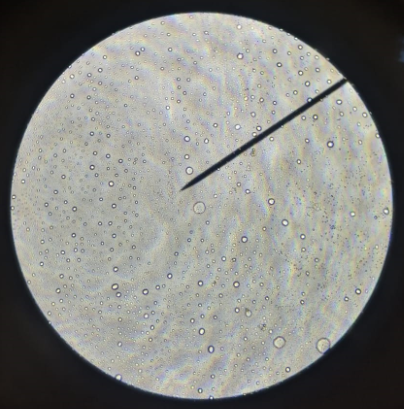


**Figure S1:** Light microscope images of SULLME using acetonitrile (left) and THF (right)

**Figure S2:** Effect of sugar type on the extraction efficiency of SULLME of favipiravir.

**
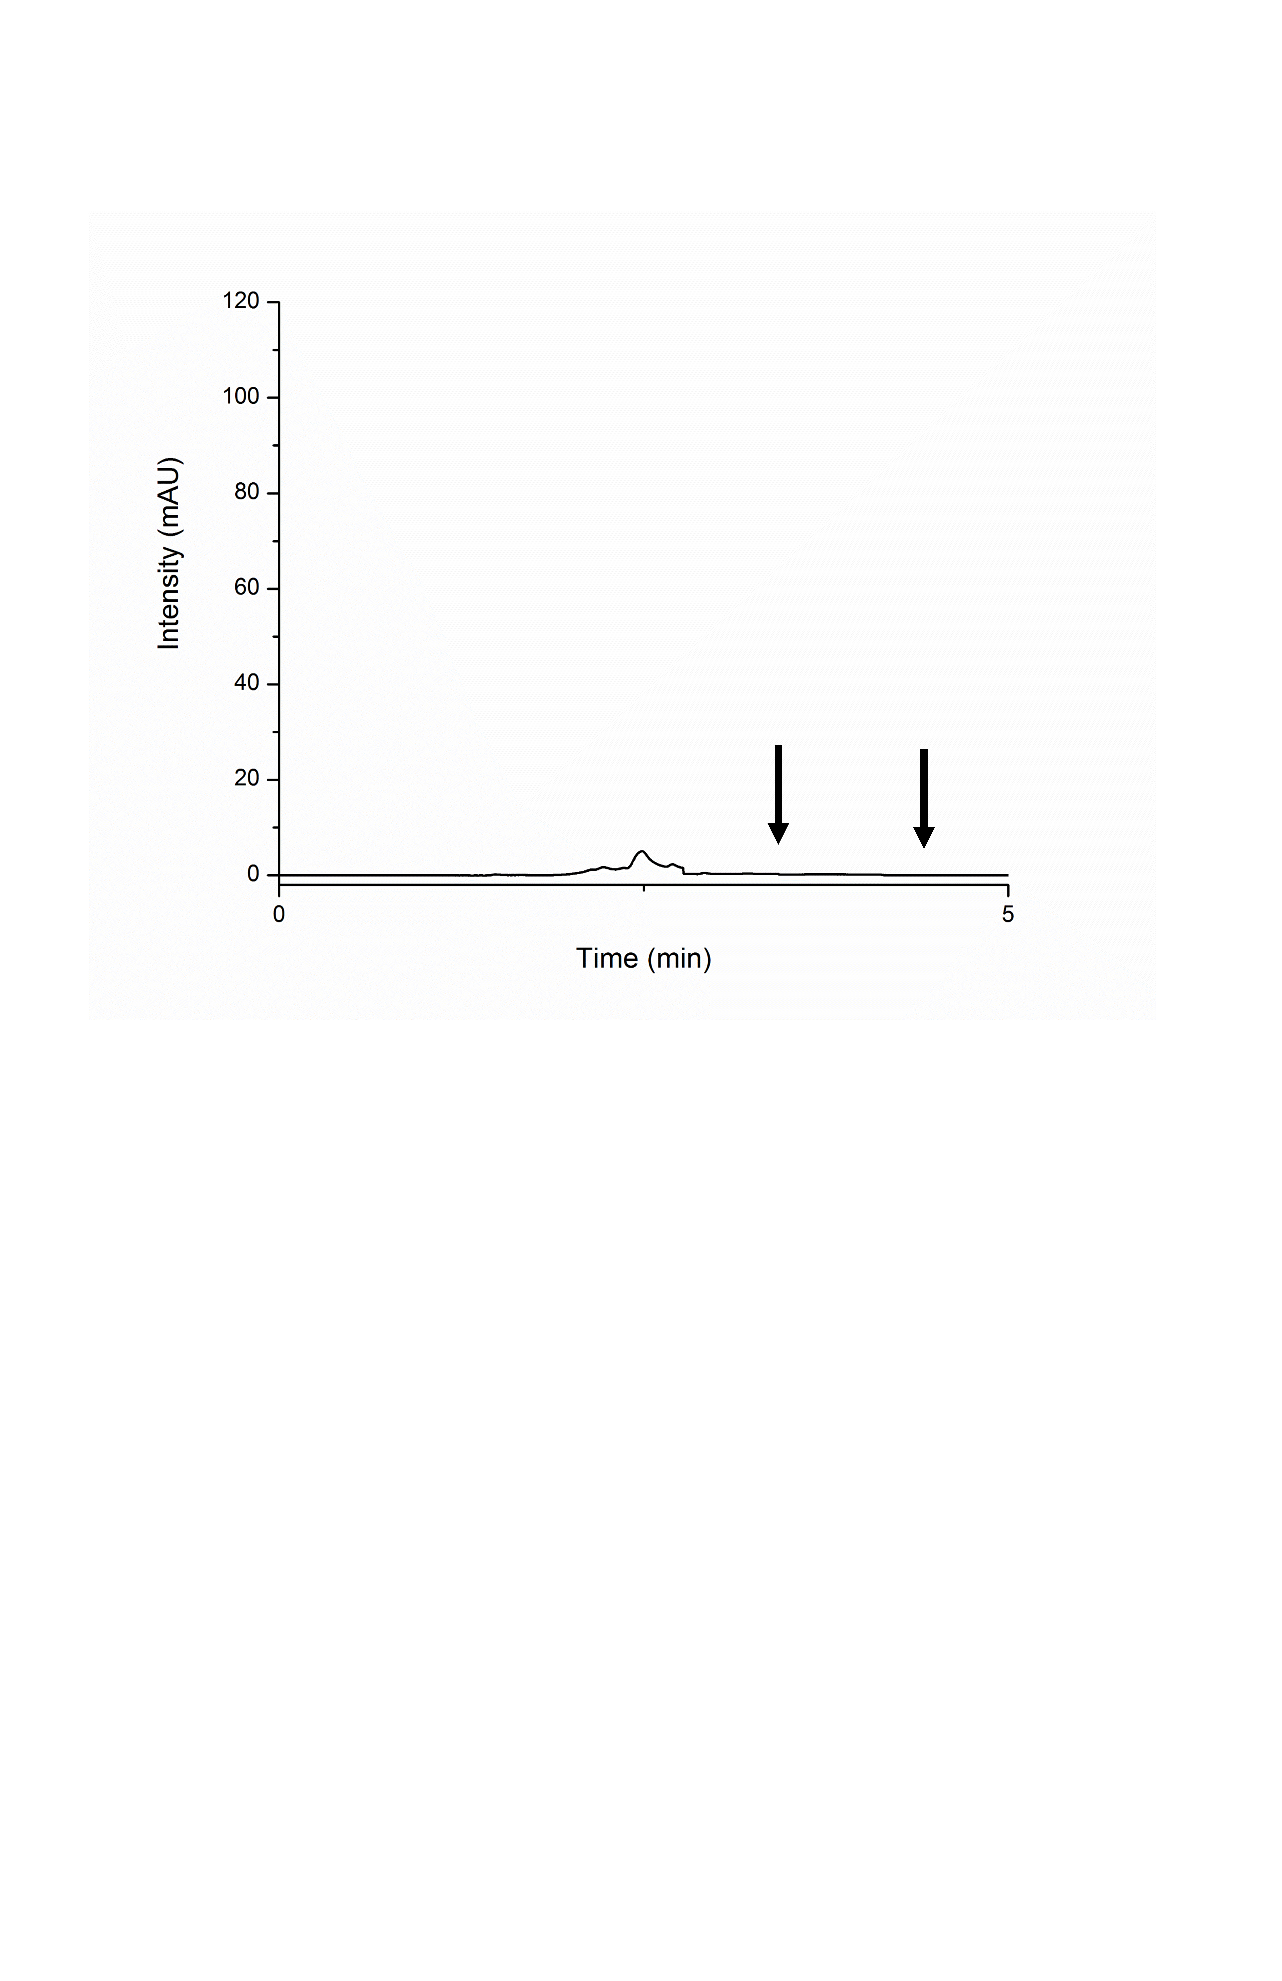
**

**Figure S3:** Chromatogram of blank plasma showing no interfering peaks at the retention periods of favipiravir and propranolol. Chromatographic conditions: Column: Thermo Hypersil ODS C18 (250 mm × 4.6 mm, 5 µm) at 30°C, Mobile phase: acetonitrile: phosphate buffer (50mM, pH 2.5) (40:60, v/v), Elution: Isocratic, Detection: UV at 323 nm, Flow rate: 1 mL/min, Injection volume: 5 µL.

**Table S1:** Comparison between the developed method and the reference LLE HPLC/UV method.

| Parameter | Comparison with reference method | | | | | |
| --- | --- | --- | --- | --- | --- | --- |
| SULLME HPLC/UV | | | Reference Method | | |
| Added  (µg/mL) | Found*  (µg/mL) | %Found | Added  (µg/mL) | Found  (µg/mL) | %Found |
|  | 40.00 | 42.43 | 106.09 | 40.00 | 43.38 | 108.46 |
|  | 40.00 | 41.63 | 104.07 | 40.00 | 43.34 | 108.36 |
|  | 40.00 | 41.91 | 104.77 | 40.00 | 41.72 | 104.31 |
| Mean |  |  | 104.98 |  |  | 107.04 |
| % RSD |  |  | 0.97 |  |  | 2.21 |
| t-test** |  |  | 0.27 |  |  |  |
| F-test** |  |  | 0.31 |  |  |  |

*Average of triplicate determinations for each concentration

** p-values at 95% confidence level (α=0.05)
